# Supplementary material
Source: Springer Nature journal article supplement (https://www.springermedizin.de/resource/supplementary/12889_2013_5832_MOESM2_ESM.pdf/9496244)

## Development of the list of criteria

## Development of the answer manual

Systematic literature research  
for tools and recommendations  
for (creating) health information

Extraction of the criteria

Grouping the criteria

Compilation of the  
list of criteria

Search for evidence  
in guidelines, HTA-Reports,  
systematic reviews

Extraction of evidence

Compilation of the  
manual

Review of  
external experts

Modification of the  
list of criteria

Modification of  
the manual

Final list and manual

Identification of  
information material

Assessment of information material

Presentation and discussion  
with the external experts panel

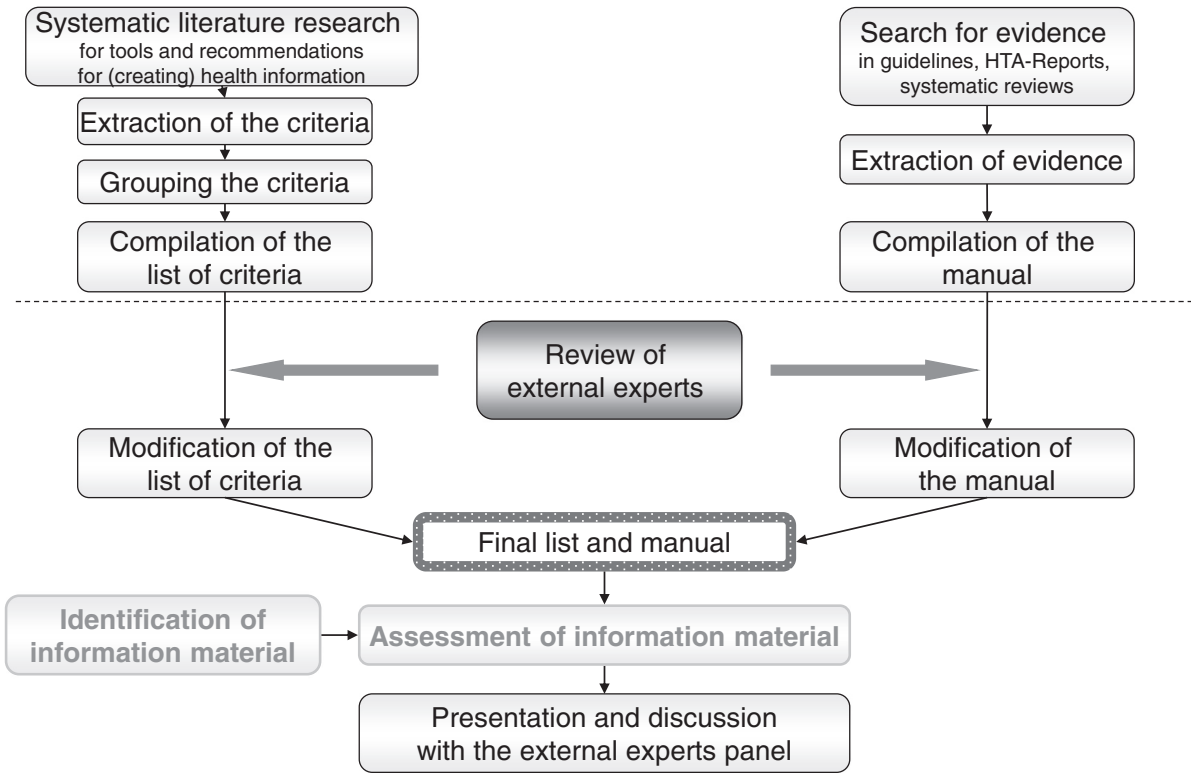

Supplement: MOESM2 [file 9496244]
